# Supplementary material for: Safety and Efficacy of Intravenous Alteplase before Endovascular Thrombectomy: A Pooled Analysis with Focus on the Elderly
Source: MDPI journal article supplement (doi:10.3390/jcm11133681), 2022-06-26

**Supplemental Table S1** Baseline characteristics by age group

|                                | <80 years<br>N=208 | ≥80 years<br>N=101 | P value          |
|--------------------------------|--------------------|--------------------|------------------|
| Age (SD)                       | 63.38 (12.3)       | 85.79 (4.6)        | -                |
| Gender male (%)                | 117 (56)           | 27 (27)            | <b>&lt;0.001</b> |
| Hypertension (%)               | 127 (61)           | 82 (82)            | <b>&lt;0.001</b> |
| Diabetes (%)                   | 63 (30)            | 31 (30)            | 0.944            |
| Hyperlipidemia (%)             | 96 (46)            | 47 (46)            | 0.952            |
| Smoking (%)                    | 72 (34)            | 13 (13)            | <b>&lt;0.001</b> |
| Atrial fibrillation (%)        | 67 (31)            | 50 (49)            | <b>0.03</b>      |
| Ischemic heart disease (%)     | 65 (31)            | 37 (36)            | 0.347            |
| Valve disease (%)              | 14 (7)             | 4 (4)              | 0.211            |
| Congestive heart failure (%)   | 11 (5)             | 10 (10)            | 0.224            |
| Chronic renal failure (%)      | 10 (5)             | 9 (9)              | 0.149            |
| Prior stroke (%)               | 30 (15)            | 13 (13)            | 0.631            |
| Malignancy (%)                 | 25 (12)            | 7 (7)              | 0.169            |
| Statins (%)                    | 45 (22)            | 30 (30)            | 0.073            |
| Antiplatelets (%)              | 53 (26)            | 34 (34)            | 0.113            |
| <b>Vessel lesion (%)</b>       |                    |                    |                  |
| ICA                            | 53 (25)            | 27 (27)            | 0.457            |
| M1 MCA                         | 110 (52)           | 57 (57)            |                  |
| M2 MCA                         | 27 (13)            | 15 (15)            |                  |
| Basilar                        | 12 (6)             | 5 (2)              |                  |
| ACA                            | 4 (2)              | 0 (0)              |                  |
| PCA                            | 0 (0)              | 0 (0)              |                  |
| Tandem lesion                  | 33 (17)            | 14 (14)            | 0.649            |
| <b>TOAST (%)</b>               |                    |                    |                  |
| Cardioembolism                 | 115 (55)           | 68 (68)            | 0.053            |
| Large- artery atherosclerosis  | 49 (23)            | 16 (16)            |                  |
| Other determined etiology      | 10 (5)             | 1 (1)              |                  |
| Undetermined                   | 32 (15)            | 14 (14)            |                  |
| Collaterals (IQR)              | 2 (1-4)            | 3 (1-4)            | 0.771            |
| Symptom to door (SD)           | 86.1 (61.5)        | 96.5 (63.2)        | 0.167            |
| Door to imaging (SD)           | 29.9 (41.3)        | 28.5 (40.8)        | 0.779            |
| Symptom to groin puncture (SD) | 253.1 (197.7)      | 225.6 (119.4)      | 0.202            |
| Door to groin puncture (SD)    | 167.8 (180.9)      | 128.8 (99.7)       | <b>0.048</b>     |
| tPA (%)                        | 96 (46)            | 51 (51)            | 0.474            |
| Number of passes (IQR)         | 1 (1-3)            | 1 (1-3)            | 0.406            |
| TICI 2b- 3 (%)                 | 176 (85)           | 78 (81)            | 0.406            |
| First pass (%)                 | 80 (38)            | 40 (40)            | 0.653            |
| Stent (%)                      | 33 (16)            | 7 (7)              | <b>0.027</b>     |
| ICH (%)                        | 39 (19)            | 15 (15)            | 0.466            |
| PH2 (%)                        | 11 (5)             | 3 (3)              | 0.399            |
| Symptomatic ICH (%)            | 6 (3)              | 2 (2)              | 0.650            |
| NIHSS on admission (IQR)       | 15 (10-20)         | 19 (14-22)         | <b>&lt;0.001</b> |
| Discharge NIHSS (IQR)          | 4 (1-8)            | 5 (1-14)           | 0.079            |
| mRS baseline (IQR)             | 0 (0-0)            | 1 (0-3)            | <b>&lt;0.001</b> |
| mRS-90 (IQR)                   | 2 (1-4)            | 4 (3-6)            | <b>&lt;0.001</b> |
| Favorable outcome (%)          | 106 (53)           | 28 (28)            | <b>&lt;0.001</b> |
| Mortality (%)                  | 19 (9)             | 23 (23)            | <b>0.001</b>     |

Values represent number of patients unless otherwise stated. Bold numbers signify statistically significant p values. SD = standard deviation, IQR = interquartile range, ICA = internal carotid artery, MCA = middle cerebral artery, ACA = anterior cerebral artery, PCA = posterior cerebral artery, HT = hemorrhagic transformation, PH = parenchymal hematoma. MRS = modified Rankin Scale.

**Supplemental Table S2** Patients below 80 years of age

|                                | Direct-EVT<br>N=112 | IVT-EVT<br>N=96 | P value     |
|--------------------------------|---------------------|-----------------|-------------|
| Age (SD)                       | 62.5 (13.2)         | 64.3 (11.1)     | 0.291       |
| Sex male (%)                   | 60 (53.6)           | 57 (59.4)       | 0.4         |
| Hypertension (%)               | 69 (61.6)           | 58 (60.4)       | 0.861       |
| Diabetes (%)                   | 31 (27.7)           | 32 (33.3)       | 0.376       |
| Hyperlipidemia (%)             | 52 (46.4)           | 43 (44.8)       | 0.813       |
| Smoking (%)                    | 34 (30.4)           | 38 (39.6)       | 0.163       |
| Atrial fibrillation (%)        | 34 (30.4)           | 33 (34.4)       | 0.536       |
| Ischemic heart disease (%)     | 30 (26.8)           | 35 (36.5)       | 0.134       |
| Valve disease (%)              | 6 (4.5)             | 9 (6.3)         | 0.793       |
| Congestive heart failure (%)   | 5 (4.5)             | 6 (7.8)         | 0.312       |
| Chronic renal failure (%)      | 3 (2.7)             | 7 (7.3)         | 0.121       |
| Prior stroke (%)               | 13 (11.6)           | 17 (17.7)       | 0.212       |
| Malignancy (%)                 | 16 (14.3)           | 9 (9.4)         | 0.278       |
| Statins (%)                    | 26 (24.4)           | 17 (19.8)       | 0.473       |
| Antiplatelets (%)              | 28 (25.5)           | 25 (26.3)       | 0.888       |
| <b>Vessel lesion (%)</b>       |                     |                 |             |
| ICA                            | 30 (26.8)           | 22 (22.9)       | 0.411       |
| M1 MCA                         | 59 (52.7)           | 51 (53.1)       |             |
| M2 MCA                         | 13 (11.6)           | 14 (14.6)       |             |
| Basilar                        | 5 (4.5)             | 7 (7.3)         |             |
| ACA                            | 3 (2.7)             | 1 (1)           |             |
| PCA                            | 0 (0)               | 0 (0)           | 0.191       |
| Tandem lesion                  | 20 (20.8)           | 13 (13.7)       |             |
| <b>TOAST (%)</b>               |                     |                 | 0.753       |
| Cardioembolism                 | 61 (54.5)           | 54 (56.3)       | 0.217       |
| Large- artery atherosclerosis  | 28 (25)             | 20 (20.8)       |             |
| Other determined etiology      | 7 (6.3)             | 3 (2.1)         |             |
| Undetermined                   | 16 (14.3)           | 16 (16.7)       |             |
| Collaterals (IQR)              | 3 (1-4)             | 3 (2-4)         |             |
| Symptom to door (SD)           | 80.4 (58.8)         | 90.6 (62.9)     | 0.228       |
| Door to imaging (SD)           | 33.9 (52.4)         | 23.9 (19.5)     | 0.078       |
| Symptom to groin puncture (SD) | 241.1 (221.6)       | 262.0 (163.0)   | 0.453       |
| Door to groin puncture (SD)    | 160.1 (203.5)       | 174.0 (149.7)   | 0.591       |
| Number of passes (IQR)         | 2 (1-4)             | 1 (1-3)         | 0.564       |
| TICI 2b- 3 (%)                 | 94 (85.5)           | 81 (84.4)       | 0.829       |
| Stent                          | 26 (23.2)           | 7 (7.3)         | <b>0.02</b> |
| HT                             | 18 (16)             | 21 (21.8)       | 0.250       |
| HT PH2                         | 5 (4.5)             | 6 (7.8)         | 0.756       |
| Symptomatic ICH                | 4 (3.6)             | 2 (3.1)         | 0.593       |
| NIHSS on admission (IQR)       | 15 (11-20)          | 14 (9-20)       | 0.231       |
| NIHSS on discharge (IQR)       | 3 (1-9)             | 5 (2-8)         | 0.78        |
| MRS baseline (IQR)             | 0 (0-0)             | 0 (0-0)         | 0.742       |
| MRS discharge (IQR)            | 3 (1-5)             | 3 (2-5)         | 0.108       |
| MRS 90 (IQR)                   | 2 (1-4)             | 3 (2-5)         | 0.347       |
| Mortality (%)                  | 9 (8)               | 10 (10.4)       | 0.552       |
| Outcome (favorable)            | 61 (58.1)           | 45 (47.9)       | 0.149       |

Values represent number of patients unless otherwise stated. Bold numbers signify statistically significant p values. SD = standard deviation, IQR = interquartile range, ICA = internal carotid artery, MCA = middle cerebral artery, ACA = anterior cerebral artery, PCA = posterior cerebral artery, HT = hemorrhagic transformation, PH = parenchymal hematoma. MRS = modified Rankin Scale.

Figure S1 – Study patient selection

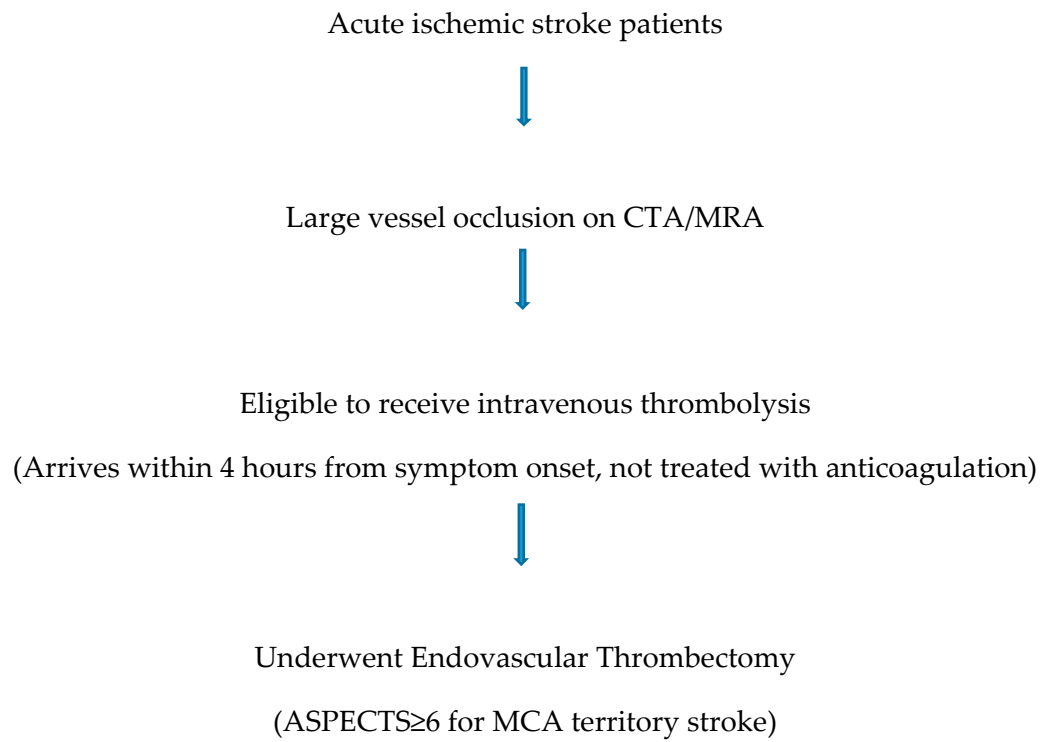

Supplement: s1 [file s1]
